# Supplementary material for: TGFβ attenuates cartilage extracellular matrix degradation via enhancing FBXO6-mediated MMP14 ubiquitination
Source: PubMed Central journal article supplement (PMC7392491; doi:10.1136/annrheumdis-2019-216911), 2020-05-14
Supplement: annrheumdis-2019-216911supp006.pdf [file annrheumdis-2019-216911supp006.pdf]

| Protein ID | UniProtKB.ID   | control  | ko       | P Value  | Fold Change Ratio | Fold Change |
|------------|----------------|----------|----------|----------|-------------------|-------------|
| 7821       | BST2_MOUSE     | 3696667  | 4833.333 | 0.000413 | 764.8275862       | 764.83      |
| 4657       | ISG15_MOUSE    | 17733333 | 81033.33 | 0.001401 | 218.8399835       | 218.84      |
| 7163       | PRELP_MOUSE    | 2326667  | 31433.33 | 0.000159 | 74.01908802       | 74.02       |
| 3603       | PSB8_MOUSE     | 3100000  | 56900    | 0.002101 | 54.48154657       | 54.48       |
| 2602       | Q3TBA3_MOUSE   | 10880000 | 238666.7 | 0.005524 | 45.58659218       | 45.59       |
| 12762      | CAH9_MOUSE     | 4753333  | 118800   | 0.008963 | 40.01122334       | 40.01       |
| 2585       | ICAM1_MOUSE    | 28600000 | 716333.3 | 0.002142 | 39.92554677       | 39.93       |
| 7853       | UB2L6_MOUSE    | 8503333  | 232333.3 | 0.011093 | 36.59971306       | 36.6        |
| 4502       | OAS1A_MOUSE    | 5840000  | 163366.7 | 0.00187  | 35.74780657       | 35.75       |
| 3010       | J7NUP1_MOUSE   | 19233333 | 619333.3 | 0.001213 | 31.05489774       | 31.05       |
| 413        | IFIT1_MOUSE    | 56200000 | 1906667  | 5.24E-05 | 29.47552448       | 29.48       |
| 4010       | SAM9L_MOUSE    | 3730000  | 157133.3 | 0.025518 | 23.73780229       | 23.74       |
| 12576      | PTGES_MOUSE    | 6423333  | 301000   | 0.00078  | 21.33997785       | 21.34       |
| 5961       | CO4B_MOUSE     | 2730000  | 133833.3 | 0.000277 | 20.3985056        | 20.4        |
| 1908       | Q9QXJ2_MOUSE   | 13033333 | 794000   | 1.8E-05  | 16.4147775        | 16.41       |
| 6404       | TAP2_MOUSE     | 5576667  | 382000   | 0.002617 | 14.59860384       | 14.6        |
| 2615       | Q91Z40_MOUSE   | 4390000  | 329666.7 | 1.06E-05 | 13.31648129       | 13.32       |
| 1898       | HA11_MOUSE     | 25000000 | 2040000  | 0.000104 | 12.25490196       | 12.25       |
| 3883       | B1AQR8_MOUSE   | 15033333 | 1245667  | 3.14E-05 | 12.06850415       | 12.07       |
| 9136       | NOS2_MOUSE     | 1396667  | 120266.7 | 0.001689 | 11.61308204       | 11.61       |
| 1543       | E9QKL6_MOUSE   | 5963333  | 541000   | 4.25E-06 | 11.02279729       | 11.02       |
| 3042       | TPSN_MOUSE     | 16833333 | 1603333  | 4.68E-06 | 10.4989605        | 10.5        |
| 3402       | GBP2_MOUSE     | 22433333 | 2260667  | 0.006141 | 9.923326452       | 9.92        |
| 7747       | A0A087WRP7_MOI | 48700000 | 5093333  | 0.000356 | 9.561518325       | 9.56        |
| 4424       | CASP8_MOUSE    | 14666667 | 1537667  | 1.36E-05 | 9.538261435       | 9.54        |
| 13067      | IPRI_MOUSE     | 1490000  | 156666.7 | 0.003829 | 9.510638298       | 9.51        |
| 2768       | IIGP1_MOUSE    | 11210000 | 1250667  | 0.024694 | 8.963219616       | 8.96        |
| 6988       | SO2A1_MOUSE    | 4000000  | 457000   | 0.000371 | 8.75273523        | 8.75        |
| 1551       | XDH_MOUSE      | 13500000 | 1580000  | 0.003614 | 8.544303797       | 8.54        |
| 5394       | IFIH1_MOUSE    | 8093333  | 997666.7 | 0.000727 | 8.112261945       | 8.11        |
| 8146       | PGH1_MOUSE     | 3163333  | 390433.3 | 0.008497 | 8.102108768       | 8.1         |
| 6717       | VNN1_MOUSE     | 5216667  | 644666.7 | 2.23E-05 | 8.092037229       | 8.09        |
| 230        | Q8C3V4_MOUSE   | 60666667 | 8083333  | 6E-05    | 7.505154639       | 7.51        |
| 2011       | E2AK2_MOUSE    | 19866667 | 2676667  | 1.83E-05 | 7.422166874       | 7.42        |
| 6444       | FBLN3_MOUSE    | 1836667  | 250333.3 | 0.000269 | 7.336884154       | 7.34        |
| 4922       | DCXR_MOUSE     | 4066667  | 564333.3 | 0.000378 | 7.206142942       | 7.21        |
| 7058       | CAH13_MOUSE    | 10276667 | 1456667  | 8.71E-05 | 7.054919908       | 7.05        |
| 1208       | LG3BP_MOUSE    | 37300000 | 5423333  | 6.81E-05 | 6.877688998       | 6.88        |
| 1351       | DDX58_MOUSE    | 25600000 | 3736667  | 0.000147 | 6.85102587        | 6.85        |
| 12511      | A0A087WNS9_MOI | 5333333  | 790333.3 | 0.011845 | 6.748207507       | 6.75        |
| 3071       | CKAP2_MOUSE    | 4000000  | 600333.3 | 0.039806 | 6.662965019       | 6.66        |
| 7641       | ERRFI_MOUSE    | 4090000  | 651000   | 0.012548 | 6.282642089       | 6.28        |
| 2578       | HA1B_MOUSE     | 12500000 | 2000000  | 0.006436 | 6.25              | 6.25        |
| 1696       | IFI5B_MOUSE    | 5290000  | 883333.3 | 0.008982 | 5.988679245       | 5.99        |
| 5322       | LOXL3_MOUSE    | 3153333  | 557666.7 | 0.000467 | 5.654512851       | 5.65        |
| 1035       | G3X9S2_MOUSE   | 28266667 | 5190000  | 0.000608 | 5.446371227       | 5.45        |
| 3505       | SBP1_MOUSE     | 13533333 | 2540000  | 1.59E-05 | 5.32808399        | 5.33        |
| 4692       | CCND1_MOUSE    | 10513333 | 1993333  | 0.03024  | 5.274247492       | 5.27        |
| 8403       | FBLN4_MOUSE    | 2513333  | 485666.7 | 0.00378  | 5.175017159       | 5.18        |

|       |                |          |          |          |             |      |
|-------|----------------|----------|----------|----------|-------------|------|
| 6567  | B2MG_MOUSE     | 30433333 | 6400000  | 0.002327 | 4.755208333 | 4.76 |
| 4378  | D3Z450_MOUSE   | 68900000 | 14533333 | 0.001012 | 4.740825688 | 4.74 |
| 581   | NEST_MOUSE     | 14700000 | 3170000  | 0.000174 | 4.637223975 | 4.64 |
| 6941  | A2AS05_MOUSE   | 512000   | 110333.3 | 0.03437  | 4.640483384 | 4.64 |
| 7684  | MT1_MOUSE      | 83033333 | 18033333 | 0.026146 | 4.604436229 | 4.6  |
| 3613  | MK09_MOUSE     | 13333333 | 2913333  | 0.001955 | 4.576659039 | 4.58 |
| 2290  | ALDOC_MOUSE    | 10800000 | 2446667  | 0.000327 | 4.414168937 | 4.41 |
| 5189  | MLKL_MOUSE     | 5306667  | 1216000  | 0.000496 | 4.364035088 | 4.36 |
| 8834  | LATS1_MOUSE    | 2950000  | 690666.7 | 0.000452 | 4.271235521 | 4.27 |
| 6327  | NGAL_MOUSE     | 11600000 | 2810000  | 0.000513 | 4.128113879 | 4.13 |
| 5218  | GUAD_MOUSE     | 4083333  | 996000   | 0.01626  | 4.099732262 | 4.1  |
| 8570  | D3Z3L3_MOUSE   | 1144333  | 279000   | 0.002614 | 4.101553166 | 4.1  |
| 8242  | F8VPL2_MOUSE   | 1856667  | 469000   | 9.27E-05 | 3.958777541 | 3.96 |
| 3176  | DOCK1_MOUSE    | 21500000 | 5483333  | 0.021406 | 3.920972644 | 3.92 |
| 5924  | TIMP1_MOUSE    | 5846667  | 1515000  | 0.008354 | 3.859185919 | 3.86 |
| 4749  | AGAL_MOUSE     | 9903333  | 2596667  | 0.001811 | 3.813863928 | 3.81 |
| 1191  | PLIN2_MOUSE    | 41100000 | 10843333 | 1.37E-05 | 3.790347372 | 3.79 |
| 9234  | A0A1D5RLM8_MOI | 874333.3 | 230766.7 | 0.030915 | 3.788819876 | 3.79 |
| 10811 | A2AKH7_MOUSE   | 2630000  | 710666.7 | 0.00727  | 3.700750469 | 3.7  |
| 6855  | BI2L1_MOUSE    | 2816667  | 762533.3 | 0.022846 | 3.693827592 | 3.69 |
| 2263  | GLUCM_MOUSE    | 10230000 | 2790000  | 0.003291 | 3.666666667 | 3.67 |
| 5473  | STEA4_MOUSE    | 6613333  | 1800000  | 7.57E-07 | 3.674074074 | 3.67 |
| 46    | TBA4A_MOUSE    | 9566667  | 2633333  | 0.000103 | 3.632911392 | 3.63 |
| 4792  | ECE1_MOUSE     | 4536667  | 1250000  | 0.001323 | 3.629333333 | 3.63 |
| 552   | AMPD3_MOUSE    | 28633333 | 7913333  | 0.000938 | 3.618365628 | 3.62 |
| 10632 | TNR23_MOUSE    | 600333.3 | 171000   | 0.000115 | 3.510721248 | 3.51 |
| 378   | A0A171EBL2_MOU | 18033333 | 5196667  | 0.000139 | 3.470173188 | 3.47 |
| 6434  | NUA4L_MOUSE    | 22833333 | 6573333  | 4.23E-05 | 3.473630832 | 3.47 |
| 5455  | TRBM_MOUSE     | 8426667  | 2440000  | 0.000478 | 3.453551913 | 3.45 |
| 3653  | PAI1_MOUSE     | 4770000  | 1406667  | 0.001    | 3.390995261 | 3.39 |
| 2718  | PML_MOUSE      | 8330000  | 2516667  | 0.035527 | 3.309933775 | 3.31 |
| 3822  | TOR3A_MOUSE    | 10500000 | 3183333  | 0.01104  | 3.298429319 | 3.3  |
| 12618 | E9Q2S9_MOUSE   | 2786667  | 873666.7 | 0.00151  | 3.189622282 | 3.19 |
| 8559  | PPM1F_MOUSE    | 4710000  | 1496667  | 3.05E-05 | 3.146993318 | 3.15 |
| 5555  | ZNFX1_MOUSE    | 1316667  | 421000   | 0.022589 | 3.127474268 | 3.13 |
| 3694  | F6XWD4_MOUSE   | 6663333  | 2166667  | 0.01483  | 3.075384615 | 3.08 |
| 5089  | GLRX1_MOUSE    | 74400000 | 24266667 | 0.001421 | 3.065934066 | 3.07 |
| 3957  | GSDMD_MOUSE    | 3876667  | 1280000  | 0.011648 | 3.028645833 | 3.03 |
| 6736  | CHSP1_MOUSE    | 34633333 | 11466667 | 0.020435 | 3.020348837 | 3.02 |
| 8228  | A0A0U1RPJ4_MOU | 1523333  | 520666.7 | 0.025188 | 2.925736236 | 2.93 |
| 3531  | TOIP2_MOUSE    | 7240000  | 2500000  | 0.012769 | 2.896       | 2.9  |
| 2381  | GSH1_MOUSE     | 10223333 | 3533333  | 0.005221 | 2.893396226 | 2.89 |
| 11663 | SCLY_MOUSE     | 715000   | 247900   | 0.044656 | 2.884227511 | 2.88 |
| 4211  | F162A_MOUSE    | 1.88E+08 | 65633333 | 0.000123 | 2.86896902  | 2.87 |
| 1321  | ASSY_MOUSE     | 50600000 | 18166667 | 0.00042  | 2.785321101 | 2.79 |
| 1403  | RIR2_MOUSE     | 24766667 | 8886667  | 0.00537  | 2.786946737 | 2.79 |
| 2323  | ILEUA_MOUSE    | 17100000 | 6130000  | 0.000377 | 2.789559543 | 2.79 |
| 977   | KANK2_MOUSE    | 21433333 | 7736667  | 0.00072  | 2.770357604 | 2.77 |
| 6347  | IFM3_MOUSE     | 1.27E+08 | 46000000 | 0.001586 | 2.767391304 | 2.77 |
| 3678  | CB39L_MOUSE    | 1886667  | 686666.7 | 0.010956 | 2.747572816 | 2.75 |

|                       |          |          |          |             |      |
|-----------------------|----------|----------|----------|-------------|------|
| 7770 CRIP1_MOUSE      | 38933333 | 14233333 | 0.000131 | 2.735362998 | 2.74 |
| 6403 AL4A1_MOUSE      | 3543333  | 1298667  | 0.04793  | 2.728439425 | 2.73 |
| 3349 TGM2_MOUSE       | 6000000  | 2203333  | 0.012971 | 2.723146747 | 2.72 |
| 7666 PRP4B_MOUSE      | 10700000 | 3936667  | 0.007433 | 2.718035563 | 2.72 |
| 3850 ANLN_MOUSE       | 5530000  | 2040000  | 0.000726 | 2.710784314 | 2.71 |
| 796 AAK1_MOUSE        | 12500000 | 4623333  | 0.045994 | 2.703677001 | 2.7  |
| 7904 FUCO2_MOUSE      | 2496667  | 935333.3 | 0.033802 | 2.669280114 | 2.67 |
| 3679 F2Z3U3_MOUSE     | 16566667 | 6326667  | 0.018201 | 2.618545838 | 2.62 |
| 4167 PTX3_MOUSE       | 6290000  | 2450000  | 0.004839 | 2.567346939 | 2.57 |
| 1987 HMOX1_MOUSE      | 1.18E+08 | 45966667 | 0.002638 | 2.559100798 | 2.56 |
| 8319 BID_MOUSE        | 7290000  | 2880000  | 0.012982 | 2.53125     | 2.53 |
| 331 RTN4_MOUSE        | 27700000 | 11200000 | 0.001198 | 2.473214286 | 2.47 |
| 915 SNX9_MOUSE        | 35200000 | 14333333 | 2.46E-05 | 2.455813953 | 2.46 |
| 4753 HPCL1_MOUSE      | 8930000  | 3666667  | 0.026232 | 2.435454545 | 2.44 |
| 4912 STOM_MOUSE       | 12033333 | 4933333  | 2.17E-05 | 2.439189189 | 2.44 |
| 3324 Q6P6I8_MOUSE     | 7010000  | 2880000  | 0.021052 | 2.434027778 | 2.43 |
| 4655 J3QP71_MOUSE     | 1323333  | 551333.3 | 0.013837 | 2.400241838 | 2.4  |
| 3943 MOT4_MOUSE       | 50666667 | 21100000 | 0.000761 | 2.401263823 | 2.4  |
| 4382 MINK1_MOUSE      | 373666.7 | 155900   | 0.026436 | 2.396835578 | 2.4  |
| 8523 FRMD8_MOUSE      | 1770000  | 737666.7 | 0.001623 | 2.39945775  | 2.4  |
| 8451 PHLA3_MOUSE      | 4080000  | 1713333  | 0.018766 | 2.381322957 | 2.38 |
| 6375 TR10B_MOUSE      | 2996667  | 1270000  | 0.000498 | 2.359580052 | 2.36 |
| 6057 ANTR1_MOUSE      | 2496667  | 1063667  | 0.048466 | 2.347226575 | 2.35 |
| 1287 TRI25_MOUSE      | 13500000 | 5776667  | 0.00352  | 2.336987882 | 2.34 |
| 2513 STXB1_MOUSE      | 12066667 | 5166667  | 0.000988 | 2.335483871 | 2.34 |
| 4457 FSTL1_MOUSE      | 13600000 | 5873333  | 0.003075 | 2.315550511 | 2.32 |
| 3136 ACSL4_MOUSE      | 6620000  | 2870000  | 0.000579 | 2.306620209 | 2.31 |
| 3774 MFGM_MOUSE       | 7006667  | 3026667  | 0.0084   | 2.314977974 | 2.31 |
| 9169 DGAT1_MOUSE      | 3516667  | 1520000  | 0.043471 | 2.313596491 | 2.31 |
| 4174 IBP7_MOUSE       | 4523333  | 1966667  | 0.000394 | 2.3         | 2.3  |
| 3206 E9PZD2_MOUSE     | 5083333  | 2223333  | 0.013104 | 2.286356822 | 2.29 |
| 8259 A0A1L1ST61_MOUSE | 19833333 | 8676667  | 0.029288 | 2.285824049 | 2.29 |
| 10331 SDC3_MOUSE      | 3263333  | 1423333  | 0.004299 | 2.292740047 | 2.29 |
| 9013 Q8BVA0_MOUSE     | 14333333 | 6330000  | 0.002648 | 2.264349658 | 2.26 |
| 3688 AMPN_MOUSE       | 3590000  | 1610333  | 0.034343 | 2.229352101 | 2.23 |
| 5223 ABCF3_MOUSE      | 5680000  | 2563333  | 2.89E-06 | 2.215864759 | 2.22 |
| 1051 KCRB_MOUSE       | 74133333 | 33600000 | 0.00082  | 2.206349206 | 2.21 |
| 5810 CATH_MOUSE       | 5470000  | 2483333  | 0.003634 | 2.202684564 | 2.2  |
| 8901 GLNA_MOUSE       | 2223333  | 1016000  | 0.017321 | 2.18832021  | 2.19 |
| 5212 D3Z125_MOUSE     | 25033333 | 11480000 | 0.042691 | 2.180603949 | 2.18 |
| 2090 F8WI14_MOUSE     | 15666667 | 7216667  | 1.37E-05 | 2.170900693 | 2.17 |
| 6817 SNP29_MOUSE      | 4850000  | 2236667  | 0.028614 | 2.168405365 | 2.17 |
| 8770 D3YU60_MOUSE     | 11133333 | 5123333  | 0.000387 | 2.173064411 | 2.17 |
| 3231 GLGB_MOUSE       | 8970000  | 4166667  | 0.010979 | 2.1528      | 2.15 |
| 5732 HSPB7_MOUSE      | 8100000  | 3766667  | 0.000161 | 2.150442478 | 2.15 |
| 8716 TYB10_MOUSE      | 34633333 | 16333333 | 0.021226 | 2.120408163 | 2.12 |
| 7712 A0A1L1STY4_MOUSE | 898666.7 | 424333.3 | 0.00309  | 2.117831893 | 2.12 |
| 1029 ANXA8_MOUSE      | 1.04E+08 | 49400000 | 6.51E-06 | 2.109311741 | 2.11 |
| 1862 TFR1_MOUSE       | 12900000 | 6153333  | 0.005217 | 2.096424702 | 2.1  |
| 4671 LOXL4_MOUSE      | 4336667  | 2073333  | 0.030613 | 2.091639871 | 2.09 |

|                       |          |          |          |             |      |
|-----------------------|----------|----------|----------|-------------|------|
| 1984 A0A0R4J008_MOUSE | 12800000 | 6140000  | 0.002056 | 2.084690554 | 2.08 |
| 8252 NOL11_MOUSE      | 1926667  | 928000   | 0.007039 | 2.076149425 | 2.08 |
| 752 GRN_MOUSE         | 1.85E+08 | 89500000 | 0.003815 | 2.067783985 | 2.07 |
| 6966 GTR1_MOUSE       | 26666667 | 12966667 | 0.006785 | 2.05655527  | 2.06 |
| 8225 A0A1B0GSI7_MOUSE | 3116667  | 1520000  | 0.00381  | 2.050438596 | 2.05 |
| 5545 AQP1_MOUSE       | 38000000 | 18700000 | 0.008161 | 2.032085561 | 2.03 |
| 7938 TCAF2_MOUSE      | 1613333  | 796333.3 | 0.033995 | 2.025952281 | 2.03 |
| 539 PYGL_MOUSE        | 33933333 | 16800000 | 0.022713 | 2.01984127  | 2.02 |
| 3180 SEH1_MOUSE       | 15633333 | 7796667  | 0.02205  | 2.005130398 | 2.01 |
| 8714 K2013_MOUSE      | 2566667  | 1279667  | 0.022347 | 2.005730659 | 2.01 |
| 3292 NDRG2_MOUSE      | 12566667 | 6276667  | 0.000182 | 2.00212427  | 2    |
| 3120 PSME2_MOUSE      | 47400000 | 23800000 | 0.016293 | 1.991596639 | 1.99 |
| 2874 EMB_MOUSE        | 27866667 | 14000000 | 0.000246 | 1.99047619  | 1.99 |
| 5796 CD44_MOUSE       | 38766667 | 19433333 | 0.002988 | 1.994854202 | 1.99 |
| 3182 KAD1_MOUSE       | 70400000 | 35766667 | 0.032606 | 1.968313141 | 1.97 |
| 3736 CD109_MOUSE      | 3016667  | 1530000  | 0.000201 | 1.97167756  | 1.97 |
| 4747 CRYAB_MOUSE      | 28533333 | 14566667 | 0.007002 | 1.958810069 | 1.96 |
| 6803                  | 1783333  | 910333.3 | 0.000802 | 1.958989381 | 1.96 |
| 3780 GAPD1_MOUSE      | 4643333  | 2370000  | 0.027368 | 1.959212377 | 1.96 |
| 962 HXK2_MOUSE        | 14633333 | 7513333  | 0.017846 | 1.947648625 | 1.95 |
| 1563 FND3A_MOUSE      | 16566667 | 8486667  | 0.003223 | 1.952081697 | 1.95 |
| 3118 M3K20_MOUSE      | 9010000  | 4616667  | 0.021572 | 1.951624549 | 1.95 |
| 7093 CDN1C_MOUSE      | 7723333  | 3966667  | 0.000616 | 1.947058824 | 1.95 |
| 1747 MP2K1_MOUSE      | 46266667 | 23866667 | 0.000745 | 1.938547486 | 1.94 |
| 2182 G3UXZ5_MOUSE     | 37800000 | 19533333 | 0.007301 | 1.935153584 | 1.94 |
| 5969 PEAK1_MOUSE      | 5686667  | 2936667  | 0.032376 | 1.936435868 | 1.94 |
| 1067 GDN_MOUSE        | 41033333 | 21233333 | 0.00368  | 1.932496075 | 1.93 |
| 3455 NQO1_MOUSE       | 25033333 | 12966667 | 0.001342 | 1.93059126  | 1.93 |
| 6764 GSTT3_MOUSE      | 5573333  | 2886667  | 0.020162 | 1.930715935 | 1.93 |
| 600 AL1A7_MOUSE       | 19133333 | 9960000  | 0.000636 | 1.921017403 | 1.92 |
| 3204 GDIR2_MOUSE      | 50866667 | 26533333 | 0.015929 | 1.917085427 | 1.92 |
| 4337 NPC2_MOUSE       | 2.47E+08 | 1.29E+08 | 0.006266 | 1.907474227 | 1.91 |
| 5538 CXA1_MOUSE       | 13966667 | 7316667  | 7.67E-05 | 1.908883827 | 1.91 |
| 8368 XYLK_MOUSE       | 1473333  | 770666.7 | 0.016659 | 1.911764706 | 1.91 |
| 1705 PGAM1_MOUSE      | 7.24E+08 | 3.84E+08 | 0.000118 | 1.886707211 | 1.89 |
| 3320 Q8C253_MOUSE     | 1.57E+08 | 83933333 | 0.011204 | 1.875297855 | 1.88 |
| 5158 PIGT_MOUSE       | 6430000  | 3426667  | 0.02517  | 1.876459144 | 1.88 |
| 549 HS71B_MOUSE       | 24066667 | 12866667 | 0.000123 | 1.870466321 | 1.87 |
| 4906 FRIH_MOUSE       | 19133333 | 10233333 | 0.00448  | 1.86970684  | 1.87 |
| 4305 CFA36_MOUSE      | 6240000  | 3343333  | 0.01363  | 1.866400798 | 1.87 |
| 9322 ATG2B_MOUSE      | 568666.7 | 303333.3 | 0.021958 | 1.874725275 | 1.87 |
| 3955 BASI_MOUSE       | 15533333 | 8333333  | 0.029885 | 1.864       | 1.86 |
| 1202 PNPB_MOUSE       | 1.06E+08 | 57300000 | 0.000797 | 1.852239674 | 1.85 |
| 5277 ACAP2_MOUSE      | 3363333  | 1820000  | 0.000228 | 1.847985348 | 1.85 |
| 4490 NEMF_MOUSE       | 6303333  | 3416667  | 0.00502  | 1.844878049 | 1.84 |
| 8220 HMGA2_MOUSE      | 1.52E+08 | 82933333 | 0.00323  | 1.828376206 | 1.83 |
| 7642 E9PUE7_MOUSE     | 1750000  | 958000   | 0.011409 | 1.826722338 | 1.83 |
| 9111 TXNIP_MOUSE      | 4630000  | 2533333  | 0.036298 | 1.827631579 | 1.83 |
| 1804 IF4G3_MOUSE      | 5563333  | 3056667  | 0.023108 | 1.820065431 | 1.82 |
| 1553 RIPK3_MOUSE      | 20800000 | 11400000 | 0.011141 | 1.824561404 | 1.82 |

|       |               |          |          |          |             |      |
|-------|---------------|----------|----------|----------|-------------|------|
| 7946  |               | 83100000 | 45566667 | 0.016077 | 1.823701536 | 1.82 |
| 3514  | F8VQK5_MOUSE  | 4550000  | 2496667  | 0.011277 | 1.822429907 | 1.82 |
| 133   | KINH_MOUSE    | 41366667 | 22800000 | 0.001437 | 1.814327485 | 1.81 |
| 6730  | CD81_MOUSE    | 46000000 | 25400000 | 6.18E-05 | 1.811023622 | 1.81 |
| 8778  | E0CZ22_MOUSE  | 1012000  | 560333.3 | 0.045425 | 1.806067817 | 1.81 |
| 12967 | SGMR1_MOUSE   | 3680000  | 2040000  | 0.000754 | 1.803921569 | 1.8  |
| 408   | SPB6_MOUSE    | 1.31E+08 | 72933333 | 0.009083 | 1.791133455 | 1.79 |
| 1376  | B1AZ46_MOUSE  | 8436667  | 4723333  | 0.015946 | 1.78616796  | 1.79 |
| 2746  | DHRS9_MOUSE   | 17966667 | 10033333 | 0.007209 | 1.790697674 | 1.79 |
| 9745  | Q8K094_MOUSE  | 5456667  | 3040000  | 0.000207 | 1.79495614  | 1.79 |
| 3776  | 3BP1_MOUSE    | 2786667  | 1566667  | 0.024943 | 1.778723404 | 1.78 |
| 9763  | NECP1_MOUSE   | 5290000  | 2973333  | 0.005798 | 1.779147982 | 1.78 |
| 8200  | MDC1_MOUSE    | 1723333  | 966000   | 0.011595 | 1.783988958 | 1.78 |
| 957   | F7AA26_MOUSE  | 21200000 | 11976667 | 0.021711 | 1.770108544 | 1.77 |
| 6394  | A0A0A0MQ90_MO | 47133333 | 26666667 | 0.003926 | 1.7675      | 1.77 |
| 8440  | G5E8C3_MOUSE  | 4960000  | 2810000  | 0.000698 | 1.765124555 | 1.77 |
| 8127  | DYLT3_MOUSE   | 3753333  | 2130000  | 0.001588 | 1.762128326 | 1.76 |
| 270   | GELS_MOUSE    | 2.17E+08 | 1.24E+08 | 0.000856 | 1.746112601 | 1.75 |
| 7680  | PGPI_MOUSE    | 6410000  | 3663333  | 7.46E-05 | 1.74977252  | 1.75 |
| 388   | INF2_MOUSE    | 16800000 | 9643333  | 0.043871 | 1.742136191 | 1.74 |
| 1435  | SAM50_MOUSE   | 12633333 | 7256667  | 0.002165 | 1.740927882 | 1.74 |
| 13267 | PTMA_MOUSE    | 53166667 | 30500000 | 0.000963 | 1.743169399 | 1.74 |
| 10101 | F107B_MOUSE   | 4213333  | 2416667  | 0.006965 | 1.743448276 | 1.74 |
| 26    | LDHA_MOUSE    | 1.32E+09 | 7.64E+08 | 0.01595  | 1.727256869 | 1.73 |
| 2416  | PGP_MOUSE     | 23300000 | 13500000 | 0.006552 | 1.725925926 | 1.73 |
| 2594  | PAK3_MOUSE    | 1860000  | 1076333  | 0.019449 | 1.728089192 | 1.73 |
| 6715  | D3Z7F7_MOUSE  | 6740000  | 3886667  | 0.003949 | 1.734133791 | 1.73 |
| 7965  | ENPP5_MOUSE   | 2420000  | 1400000  | 0.047084 | 1.728571429 | 1.73 |
| 3492  | PAR12_MOUSE   | 4253333  | 2473333  | 0.000281 | 1.71967655  | 1.72 |
| 1011  | CATB_MOUSE    | 1.45E+08 | 84800000 | 0.004423 | 1.706367925 | 1.71 |
| 1246  | ESTD_MOUSE    | 2.37E+08 | 1.4E+08  | 0.001204 | 1.699045346 | 1.7  |
| 6168  | CD151_MOUSE   | 9170000  | 5386667  | 0.014099 | 1.702351485 | 1.7  |
| 6438  | OGA_MOUSE     | 2820000  | 1663333  | 0.019283 | 1.695390782 | 1.7  |
| 6182  | MBOA5_MOUSE   | 6233333  | 3676667  | 0.003665 | 1.695376247 | 1.7  |
| 7338  | CREL1_MOUSE   | 3696667  | 2173333  | 0.003484 | 1.700920245 | 1.7  |
| 171   | G6PI_MOUSE    | 3.31E+08 | 1.96E+08 | 0.000393 | 1.692504259 | 1.69 |
| 6459  | SAP3_MOUSE    | 13866667 | 8196667  | 0.029181 | 1.691744612 | 1.69 |
| 303   | P4HA2_MOUSE   | 1.63E+08 | 97133333 | 0.003752 | 1.681194235 | 1.68 |
| 941   | E9QAT4_MOUSE  | 12400000 | 7390000  | 0.023853 | 1.677943166 | 1.68 |
| 3864  | Q3TBV5_MOUSE  | 1.8E+08  | 1.08E+08 | 0.000843 | 1.675550046 | 1.68 |
| 4294  | Q8C845_MOUSE  | 10916667 | 6486667  | 0.00729  | 1.682939363 | 1.68 |
| 5799  | COTL1_MOUSE   | 17666667 | 10526667 | 6.27E-05 | 1.678277391 | 1.68 |
| 2865  | SAFB2_MOUSE   | 1620000  | 964666.7 | 0.02324  | 1.679336558 | 1.68 |
| 7477  | STS_MOUSE     | 5100000  | 3030000  | 0.036058 | 1.683168317 | 1.68 |
| 1979  | MPPA_MOUSE    | 11090000 | 6633333  | 0.038045 | 1.671859296 | 1.67 |
| 2061  | GGYF2_MOUSE   | 8313333  | 4986667  | 0.008722 | 1.667112299 | 1.67 |
| 11089 | TYB4_MOUSE    | 56933333 | 34000000 | 0.001367 | 1.674509804 | 1.67 |
| 4497  | E9QPX1_MOUSE  | 4480000  | 2680000  | 0.035303 | 1.671641791 | 1.67 |
| 8190  | M4K5_MOUSE    | 733333.3 | 438333.3 | 0.016267 | 1.673003802 | 1.67 |
| 6     | ACTB_MOUSE    | 5523333  | 3326667  | 0.020192 | 1.660320641 | 1.66 |

|      |                |          |          |          |             |      |
|------|----------------|----------|----------|----------|-------------|------|
| 420  | 6PGD_MOUSE     | 1.66E+08 | 99866667 | 0.011705 | 1.660213618 | 1.66 |
| 982  | NAMPT_MOUSE    | 34400000 | 20766667 | 0.018223 | 1.656500803 | 1.66 |
| 1527 | D3Z4N0_MOUSE   | 14966667 | 90133333 | 0.001297 | 1.660502959 | 1.66 |
| 5482 | PKHO2_MOUSE    | 10273333 | 61733333 | 0.014151 | 1.664146868 | 1.66 |
| 2539 | SIL1_MOUSE     | 15033333 | 9100000  | 0.041051 | 1.652014652 | 1.65 |
| 5783 | NPTN_MOUSE     | 22633333 | 13733333 | 0.007357 | 1.648058252 | 1.65 |
| 3738 | KAD4_MOUSE     | 40000000 | 24366667 | 0.012532 | 1.641586867 | 1.64 |
| 2961 | Q91Z50_MOUSE   | 18233333 | 11133333 | 0.004092 | 1.637724551 | 1.64 |
| 347  | PFKAL_MOUSE    | 1.23E+08 | 74966667 | 0.002632 | 1.634504224 | 1.63 |
| 4835 | SODM_MOUSE     | 47000000 | 28833333 | 0.000704 | 1.630057803 | 1.63 |
| 7059 | PEA15_MOUSE    | 22233333 | 13600000 | 0.013977 | 1.634803922 | 1.63 |
| 8489 | TRM5_MOUSE     | 13933333 | 8550000  | 0.001457 | 1.62962963  | 1.63 |
| 696  | ARHG1_MOUSE    | 15766667 | 9706667  | 0.013735 | 1.624313187 | 1.62 |
| 4414 | CANB1_MOUSE    | 13100000 | 8096667  | 0.026062 | 1.617949774 | 1.62 |
| 201  | G6PD1_MOUSE    | 66500000 | 41333333 | 0.011829 | 1.608870968 | 1.61 |
| 666  | SYK_MOUSE      | 58833333 | 36466667 | 0.001753 | 1.613345521 | 1.61 |
| 1106 | TOIP1_MOUSE    | 33200000 | 20566667 | 0.049873 | 1.614262561 | 1.61 |
| 2288 | EPHA2_MOUSE    | 9370000  | 5806667  | 0.031449 | 1.613662457 | 1.61 |
| 7611 | NUBP1_MOUSE    | 3410000  | 2123333  | 0.029043 | 1.605965463 | 1.61 |
| 1631 | RBGPR_MOUSE    | 11400000 | 7140000  | 0.046203 | 1.596638655 | 1.6  |
| 3350 | A0A0R4J1D0_MOU | 17966667 | 11236667 | 0.008459 | 1.598932068 | 1.6  |
| 5365 | Q3U5D9_MOUSE   | 5780000  | 3616667  | 0.001566 | 1.598156682 | 1.6  |
| 5116 | CDC73_MOUSE    | 2350000  | 1466667  | 0.006879 | 1.602272727 | 1.6  |
| 3041 | PNPT1_MOUSE    | 4376667  | 2753333  | 0.022507 | 1.589588378 | 1.59 |
| 4302 | PGES2_MOUSE    | 6950000  | 4360000  | 0.016685 | 1.594036697 | 1.59 |
| 2725 | OGFR_MOUSE     | 12833333 | 8090000  | 0.021728 | 1.58632056  | 1.59 |
| 4613 | RABP1_MOUSE    | 12300000 | 7713333  | 0.004437 | 1.594641314 | 1.59 |
| 7944 | GALM_MOUSE     | 5030000  | 3156667  | 0.001319 | 1.59345301  | 1.59 |
| 2514 | GSTP1_MOUSE    | 2.84E+08 | 1.8E+08  | 0.002705 | 1.576481481 | 1.58 |
| 144  | PFKAP_MOUSE    | 94433333 | 59833333 | 0.000832 | 1.578272981 | 1.58 |
| 2504 | DEST_MOUSE     | 3.75E+08 | 2.37E+08 | 0.012463 | 1.581153305 | 1.58 |
| 638  | DDX21_MOUSE    | 30066667 | 19033333 | 0.018158 | 1.579684764 | 1.58 |
| 1382 | PPGB_MOUSE     | 82600000 | 52400000 | 0.002142 | 1.576335878 | 1.58 |
| 1604 | SMC2_MOUSE     | 9000000  | 5703333  | 0.025841 | 1.578024547 | 1.58 |
| 2701 | PPME1_MOUSE    | 18233333 | 11523333 | 0.035403 | 1.582296789 | 1.58 |
| 1832 | MRP1_MOUSE     | 6836667  | 4333333  | 0.006637 | 1.577692308 | 1.58 |
| 1237 | IMA1_MOUSE     | 26533333 | 16866667 | 0.006411 | 1.57312253  | 1.57 |
| 2659 | BLVRB_MOUSE    | 56100000 | 35766667 | 0.02038  | 1.568499534 | 1.57 |
| 7942 | S10AG_MOUSE    | 8610000  | 5500000  | 0.009401 | 1.565454545 | 1.57 |
| 7279 | CSF1_MOUSE     | 2193333  | 1400000  | 0.026522 | 1.566666667 | 1.57 |
| 4710 | MIF_MOUSE      | 1.48E+09 | 9.49E+08 | 0.049891 | 1.563061798 | 1.56 |
| 1652 | LDHB_MOUSE     | 32500000 | 20800000 | 0.014119 | 1.5625      | 1.56 |
| 3201 | IF6_MOUSE      | 49366667 | 31733333 | 0.011524 | 1.555672269 | 1.56 |
| 7949 | PSD10_MOUSE    | 3530000  | 2260000  | 0.002932 | 1.561946903 | 1.56 |
| 775  | CATD_MOUSE     | 2.74E+08 | 1.77E+08 | 0.006593 | 1.547834275 | 1.55 |
| 2171 | PTK7_MOUSE     | 16166667 | 10460000 | 0.002338 | 1.545570427 | 1.55 |
| 3859 | RALB_MOUSE     | 9036667  | 5813333  | 0.019285 | 1.554472477 | 1.55 |
| 8484 | AT1B1_MOUSE    | 2940000  | 1893333  | 0.011294 | 1.552816901 | 1.55 |
| 363  | AT1A1_MOUSE    | 82900000 | 53900000 | 0.02855  | 1.538033395 | 1.54 |
| 1226 | F8VQJ3_MOUSE   | 6190000  | 4023333  | 0.021484 | 1.538525269 | 1.54 |



|      |                  |          |          |          |             |       |
|------|------------------|----------|----------|----------|-------------|-------|
| 6259 | CNPY3_MOUSE      | 11833333 | 7666667  | 0.03477  | 1.543478261 | 1.54  |
| 8149 | D3Z6H3_MOUSE     | 5653333  | 3673333  | 0.041032 | 1.539019964 | 1.54  |
| 8615 | CASP6_MOUSE      | 1666667  | 1082000  | 0.018572 | 1.540357363 | 1.54  |
| 9083 | IPP2_MOUSE       | 8716667  | 5646667  | 0.032737 | 1.543683589 | 1.54  |
| 1356 | A2AEX8_MOUSE     | 70666667 | 46300000 | 0.025357 | 1.526277898 | 1.53  |
| 1587 | DDAH1_MOUSE      | 56466667 | 37233333 | 0.001489 | 1.51656222  | 1.52  |
| 1111 | MOV10_MOUSE      | 41500000 | 27300000 | 0.014335 | 1.52014652  | 1.52  |
| 1357 | SQOR_MOUSE       | 25333333 | 16666667 | 5.99E-05 | 1.52        | 1.52  |
| 3951 | UBP24_MOUSE      | 4426667  | 2916667  | 0.00866  | 1.517714286 | 1.52  |
| 4268 | A2AH75_MOUSE     | 659333.3 | 434333.3 | 0.044118 | 1.518035303 | 1.52  |
| 4289 | SCRB2_MOUSE      | 11466667 | 7553333  | 0.017054 | 1.518093557 | 1.52  |
| 839  | TPIS_MOUSE       | 9.53E+08 | 6.33E+08 | 0.004095 | 1.505637513 | 1.51  |
| 1936 | GLCM_MOUSE       | 32333333 | 21400000 | 0.000751 | 1.510903427 | 1.51  |
| 6222 | SDF2L_MOUSE      | 14233333 | 9440000  | 0.005901 | 1.507768362 | 1.51  |
| 8601 | ACYP2_MOUSE      | 6870000  | 4550000  | 0.016837 | 1.50989011  | 1.51  |
| 945  | MAOM_MOUSE       | 17500000 | 11666667 | 0.003481 | 1.5         | 1.5   |
| 2334 | TM9S2_MOUSE      | 35066667 | 52733333 | 0.003901 | 0.664981037 | -1.5  |
| 3579 | ARPC3_MOUSE      | 40033333 | 60200000 | 0.031667 | 0.665005537 | -1.5  |
| 5017 | AN32E_MOUSE      | 24766667 | 37200000 | 0.018145 | 0.665770609 | -1.5  |
| 2044 | DHX29_MOUSE      | 3180000  | 4813333  | 0.046216 | 0.66066482  | -1.51 |
| 2830 | ERLN1_MOUSE      | 10666667 | 16100000 | 0.043948 | 0.66252588  | -1.51 |
| 191  | GRP75_MOUSE      | 2.54E+08 | 3.87E+08 | 0.004053 | 0.656551724 | -1.52 |
| 1074 | VDAC1_MOUSE      | 1.92E+08 | 2.92E+08 | 0.039048 | 0.656571429 | -1.52 |
| 1995 | CDC42_MOUSE      | 1.4E+08  | 2.14E+08 | 0.01283  | 0.656074766 | -1.52 |
| 771  | PPID_MOUSE       | 32033333 | 48666667 | 0.024086 | 0.658219178 | -1.52 |
| 3137 | MBNL1_MOUSE      | 10446667 | 15833333 | 0.017663 | 0.659789474 | -1.52 |
| 3555 | FBXW8_MOUSE      | 3206667  | 4870000  | 0.013125 | 0.658453114 | -1.52 |
| 3469 | A0A0B4J1L4_MOUSE | 3113333  | 4743333  | 0.032668 | 0.656359803 | -1.52 |
| 6280 | RBBP9_MOUSE      | 5863333  | 8883333  | 0.014948 | 0.660037523 | -1.52 |
| 428  | ATLA3_MOUSE      | 37433333 | 57333333 | 0.008216 | 0.652906977 | -1.53 |
| 942  | ETFA_MOUSE       | 91866667 | 1.4E+08  | 0.049824 | 0.654631829 | -1.53 |
| 3301 | IMPA3_MOUSE      | 14300000 | 21933333 | 0.036054 | 0.651975684 | -1.53 |
| 3005 | KAD3_MOUSE       | 11433333 | 17466667 | 0.013637 | 0.654580153 | -1.53 |
| 4055 | F91A1_MOUSE      | 2270000  | 3480000  | 0.039339 | 0.652298851 | -1.53 |
| 80   | NEDD4_MOUSE      | 96933333 | 1.49E+08 | 0.000636 | 0.649107143 | -1.54 |
| 828  | PICAL_MOUSE      | 13933333 | 21466667 | 0.006123 | 0.649068323 | -1.54 |
| 4961 | RSMB_MOUSE       | 28566667 | 44100000 | 0.000826 | 0.647770219 | -1.54 |
| 345  | TRAP1_MOUSE      | 24066667 | 37333333 | 0.006485 | 0.644642857 | -1.55 |
| 5016 | RAB9A_MOUSE      | 4903333  | 7586667  | 0.004892 | 0.646309315 | -1.55 |
| 7103 | FKB14_MOUSE      | 1973333  | 3063333  | 0.003365 | 0.644178455 | -1.55 |
| 7675 | DEOC_MOUSE       | 1606667  | 2496667  | 0.03359  | 0.6435247   | -1.55 |
| 1633 | Q99N15_MOUSE     | 57233333 | 89100000 | 0.036019 | 0.64234942  | -1.56 |
| 1866 | M2OM_MOUSE       | 15666667 | 24500000 | 0.034955 | 0.639455782 | -1.56 |
| 5120 | E9QK83_MOUSE     | 775333.3 | 1206667  | 0.038199 | 0.642541436 | -1.56 |
| 7489 | Q3TSS7_MOUSE     | 1673333  | 2603333  | 0.012486 | 0.642765685 | -1.56 |
| 2325 | DDX50_MOUSE      | 2800000  | 4383333  | 0.023789 | 0.63878327  | -1.57 |
| 660  | IF4A3_MOUSE      | 31766667 | 50300000 | 0.042995 | 0.631544069 | -1.58 |
| 2868 | D3YW19_MOUSE     | 2820000  | 4456667  | 0.035211 | 0.63275991  | -1.58 |
| 6034 | NT5D3_MOUSE      | 1386667  | 2196667  | 0.012768 | 0.631259484 | -1.58 |
| 5676 | E9QQ10_MOUSE     | 550333.3 | 868000   | 0.049621 | 0.634024578 | -1.58 |

|       |                   |          |          |          |             |       |
|-------|-------------------|----------|----------|----------|-------------|-------|
| 3315  | FNTA_MOUSE        | 4270000  | 6813333  | 0.000238 | 0.626712329 | -1.6  |
| 4690  | SMAD3_MOUSE       | 1426667  | 2280000  | 0.02487  | 0.625730994 | -1.6  |
| 7542  | J3QK13_MOUSE      | 1093333  | 1753333  | 0.030774 | 0.623574144 | -1.6  |
| 8568  | A2AJG0_MOUSE      | 702666.7 | 1123333  | 0.024986 | 0.625519288 | -1.6  |
| 5905  | STAR5_MOUSE       | 3386667  | 5446667  | 0.010028 | 0.621787026 | -1.61 |
| 2982  | D3YU59_MOUSE      | 3476667  | 5590000  | 0.041312 | 0.621943948 | -1.61 |
| 6094  | TRUA_MOUSE        | 1256667  | 2023333  | 0.007083 | 0.621087315 | -1.61 |
| 8089  | A2A8E2_MOUSE      | 5466667  | 8783333  | 0.020165 | 0.622390892 | -1.61 |
| 1160  | PURA2_MOUSE       | 20833333 | 33800000 | 0.008392 | 0.616370809 | -1.62 |
| 1943  | PCCA_MOUSE        | 5383333  | 8710000  | 0.010124 | 0.618063529 | -1.62 |
| 3844  | MARC2_MOUSE       | 8933333  | 14500000 | 0.041924 | 0.616091954 | -1.62 |
| 729   | GLSK_MOUSE        | 26733333 | 43533333 | 0.003076 | 0.614088821 | -1.63 |
| 4563  | PZP_MOUSE         | 12633333 | 20566667 | 0.034343 | 0.614262561 | -1.63 |
| 2824  | IPO11_MOUSE       | 5026667  | 8193333  | 0.028938 | 0.613506916 | -1.63 |
| 4518  | MCCB_MOUSE        | 2833333  | 4626667  | 0.009019 | 0.612391931 | -1.63 |
| 6932  | COX15_MOUSE       | 2310000  | 3760000  | 0.008181 | 0.614361702 | -1.63 |
| 3475  | BAG5_MOUSE        | 5980000  | 9816667  | 0.018731 | 0.609168081 | -1.64 |
| 6521  | MPC2_MOUSE        | 7790000  | 12800000 | 0.002031 | 0.60859375  | -1.64 |
| 2003  | ITA1_MOUSE        | 7216667  | 11900000 | 0.008414 | 0.606442577 | -1.65 |
| 4637  | ASPC1_MOUSE       | 3906667  | 6446667  | 0.015276 | 0.605997932 | -1.65 |
| 328   | Q80YQ1_MOUSE      | 44700000 | 74400000 | 0.019619 | 0.600806452 | -1.66 |
| 2724  | Q9ESU7_MOUSE      | 16700000 | 27800000 | 0.000753 | 0.600719424 | -1.66 |
| 5368  | A0A0R4IZY9_MOUSE  | 1516667  | 2516667  | 0.024241 | 0.602649007 | -1.66 |
| 1096  | PSB5_MOUSE        | 32833333 | 54833333 | 0.014494 | 0.598784195 | -1.67 |
| 1311  | STEA3_MOUSE       | 18833333 | 31366667 | 0.007052 | 0.60042508  | -1.67 |
| 3017  | DOPD_MOUSE        | 20066667 | 33433333 | 1.31E-05 | 0.600199402 | -1.67 |
| 1752  | AP3M1_MOUSE       | 9236667  | 15433333 | 0.026832 | 0.598488121 | -1.67 |
| 996   | HMCS1_MOUSE       | 13366667 | 22400000 | 0.040137 | 0.59672619  | -1.68 |
| 2823  | MMP14_MOUSE       | 7890000  | 13266667 | 0.000631 | 0.594723618 | -1.68 |
| 6039  | E9Q179_MOUSE      | 2136667  | 3583333  | 0.049208 | 0.59627907  | -1.68 |
| 12863 | G3X8S8_MOUSE      | 2170000  | 3640000  | 0.044704 | 0.596153846 | -1.68 |
| 767   | ACACA_MOUSE       | 6883333  | 11633333 | 0.000692 | 0.591690544 | -1.69 |
| 2165  | ECHM_MOUSE        | 30233333 | 51133333 | 0.00532  | 0.591264668 | -1.69 |
| 2269  | THUM1_MOUSE       | 5686667  | 9586667  | 0.001852 | 0.593184979 | -1.69 |
| 6228  | FKBP2_MOUSE       | 18633333 | 31566667 | 0.016029 | 0.590285111 | -1.69 |
| 2423  | DNMT1_MOUSE       | 3826667  | 6510000  | 0.043065 | 0.58781362  | -1.7  |
| 2258  | CTGF_MOUSE        | 8813333  | 14966667 | 0.007684 | 0.588864143 | -1.7  |
| 6284  | MTMR2_MOUSE       | 1403333  | 2380000  | 0.024417 | 0.589635854 | -1.7  |
| 282   | E9PWE8_MOUSE      | 18800000 | 32166667 | 0.017006 | 0.584455959 | -1.71 |
| 8023  | NOV_MOUSE         | 622666.7 | 1063333  | 0.009253 | 0.585579937 | -1.71 |
| 8161  | ARXS1_MOUSE       | 3596667  | 6153333  | 0.007027 | 0.584507042 | -1.71 |
| 8318  | CATK_MOUSE        | 1310000  | 2243333  | 0.043567 | 0.583952452 | -1.71 |
| 7129  | Q3TLQ0_MOUSE      | 1333333  | 2290000  | 0.009594 | 0.58224163  | -1.72 |
| 456   | E9QAH1_MOUSE      | 6980000  | 12066667 | 0.03641  | 0.578453039 | -1.73 |
| 2799  | A0A11L1SS90_MOUSE | 3626667  | 6256667  | 0.024007 | 0.579648375 | -1.73 |
| 4552  | STRN_MOUSE        | 2990000  | 5160000  | 0.019347 | 0.579457364 | -1.73 |
| 4081  | SRPK1_MOUSE       | 1836667  | 3173333  | 0.044933 | 0.578781513 | -1.73 |
| 8160  | NTPCR_MOUSE       | 1363333  | 2353333  | 0.017334 | 0.579320113 | -1.73 |
| 4867  | RAD21_MOUSE       | 3116667  | 5416667  | 0.0202   | 0.575384615 | -1.74 |
| 5574  | DPP9_MOUSE        | 1763333  | 3066667  | 0.005825 | 0.575       | -1.74 |



|       |                |          |          |          |             |       |
|-------|----------------|----------|----------|----------|-------------|-------|
| 7028  | SFR1_MOUSE     | 1200000  | 2086667  | 0.005991 | 0.575079872 | -1.74 |
| 3219  | CUL7_MOUSE     | 3093333  | 5423333  | 0.027211 | 0.570374923 | -1.75 |
| 4154  | MEP50_MOUSE    | 5603333  | 9833333  | 0.007093 | 0.569830508 | -1.75 |
| 8960  | EPT1_MOUSE     | 3366667  | 5886667  | 0.028486 | 0.57191393  | -1.75 |
| 567   | IDHP_MOUSE     | 45200000 | 79366667 | 0.007101 | 0.56950861  | -1.76 |
| 4899  | IST1_MOUSE     | 5443333  | 9563333  | 0.005867 | 0.56918787  | -1.76 |
| 7289  | MD1L1_MOUSE    | 336000   | 592333.3 | 0.012498 | 0.567248171 | -1.76 |
| 5305  | RRFM_MOUSE     | 2803333  | 4963333  | 0.004843 | 0.564808596 | -1.77 |
| 7836  | CE051_MOUSE    | 2056667  | 3650000  | 0.01732  | 0.56347032  | -1.77 |
| 13097 | RRP15_MOUSE    | 1064000  | 1886667  | 0.024844 | 0.563957597 | -1.77 |
| 8669  | CRNL1_MOUSE    | 365000   | 647333.3 | 0.033356 | 0.563851699 | -1.77 |
| 3107  | A0A0A6YY47_MOU | 5690000  | 10133333 | 0.01346  | 0.561513158 | -1.78 |
| 7905  |                | 2170000  | 3873333  | 0.000324 | 0.560240964 | -1.78 |
| 7578  | RT07_MOUSE     | 2320000  | 4133333  | 0.013456 | 0.561290323 | -1.78 |
| 1718  | YBOX3_MOUSE    | 18933333 | 33800000 | 0.013014 | 0.560157791 | -1.79 |
| 4676  | GNA1_MOUSE     | 14933333 | 26700000 | 0.006108 | 0.559300874 | -1.79 |
| 8215  | USE1_MOUSE     | 1463333  | 2616667  | 0.016333 | 0.559235669 | -1.79 |
| 504   | LCAP_MOUSE     | 11800000 | 21200000 | 0.010619 | 0.556603774 | -1.8  |
| 3938  | Q8C6B0_MOUSE   | 9133333  | 16466667 | 5.44E-05 | 0.55465587  | -1.8  |
| 740   | HUWE1_MOUSE    | 6420000  | 11603333 | 0.023121 | 0.553289285 | -1.81 |
| 2106  | NASP_MOUSE     | 10233333 | 18566667 | 0.004049 | 0.551166966 | -1.81 |
| 8143  | IFRD1_MOUSE    | 656000   | 1190000  | 0.002492 | 0.551260504 | -1.81 |
| 6295  | A0A0U1RP62_MOL | 3510000  | 6440000  | 0.038866 | 0.545031056 | -1.83 |
| 6157  | ILKAP_MOUSE    | 1646667  | 3036667  | 0.012833 | 0.542261251 | -1.84 |
| 2787  | ACSL3_MOUSE    | 4126667  | 7623333  | 0.005455 | 0.541320507 | -1.85 |
| 5941  | EBP2_MOUSE     | 1330000  | 2466667  | 0.016306 | 0.539189189 | -1.85 |
| 500   | E9PUM4_MOUSE   | 6443333  | 11966667 | 0.043145 | 0.538440111 | -1.86 |
| 6223  | B9EKS2_MOUSE   | 1116667  | 2080000  | 0.022255 | 0.536858974 | -1.86 |
| 7481  | RM04_MOUSE     | 1220000  | 2280000  | 0.030261 | 0.535087719 | -1.87 |
| 2217  | CAN6_MOUSE     | 6233333  | 11700000 | 0.006297 | 0.532763533 | -1.88 |
| 2860  | WDR11_MOUSE    | 2506667  | 4723333  | 0.002913 | 0.530698659 | -1.88 |
| 5668  | MCCA_MOUSE     | 2643333  | 4960000  | 0.029019 | 0.532930108 | -1.88 |
| 179   | SYAC_MOUSE     | 75500000 | 1.43E+08 | 0.000508 | 0.527972028 | -1.89 |
| 6522  | NDUA7_MOUSE    | 4700000  | 9033333  | 0.045327 | 0.520295203 | -1.92 |
| 5249  | RABE2_MOUSE    | 1940000  | 3750000  | 0.000272 | 0.517333333 | -1.93 |
| 12465 | ANKY2_MOUSE    | 1242667  | 2410000  | 0.023406 | 0.515629322 | -1.94 |
| 2633  | CHIP_MOUSE     | 6720000  | 13100000 | 0.010113 | 0.512977099 | -1.95 |
| 267   | MYH10_MOUSE    | 42533333 | 83300000 | 0.009236 | 0.510604242 | -1.96 |
| 6252  | FCHO2_MOUSE    | 857000   | 1683333  | 0.04262  | 0.509108911 | -1.96 |
| 75    | PCKGM_MOUSE    | 73633333 | 1.46E+08 | 0.02668  | 0.5043379   | -1.98 |
| 5600  | NDUS8_MOUSE    | 8066667  | 15933333 | 0.025868 | 0.506276151 | -1.98 |
| 591   | LMCD1_MOUSE    | 28866667 | 57466667 | 1.1E-08  | 0.502320186 | -1.99 |
| 320   | CO5A2_MOUSE    | 18066667 | 36066667 | 0.000739 | 0.500924214 | -2    |
| 3804  | CSAD_MOUSE     | 2470000  | 4930000  | 0.003326 | 0.501014199 | -2    |
| 7533  | CGRE1_MOUSE    | 4940000  | 9893333  | 0.017552 | 0.499326146 | -2    |
| 2412  | SERB_MOUSE     | 19933333 | 40100000 | 0.022998 | 0.497090607 | -2.01 |
| 6352  | UBE2H_MOUSE    | 5636667  | 11340000 | 0.020662 | 0.497060553 | -2.01 |
| 851   | 4F2_MOUSE      | 38900000 | 78533333 | 0.010065 | 0.49533107  | -2.02 |
| 5474  | SYTM_MOUSE     | 1049000  | 2116667  | 0.008722 | 0.495590551 | -2.02 |
| 3563  | PPR1B_MOUSE    | 11033333 | 22366667 | 0.02377  | 0.493293592 | -2.03 |

|       |                  |          |          |          |             |       |
|-------|------------------|----------|----------|----------|-------------|-------|
| 3358  | E9PX53_MOUSE     | 1866667  | 3790000  | 0.028929 | 0.492524186 | -2.03 |
| 2782  | MYL9_MOUSE       | 5716667  | 11646667 | 0.030652 | 0.490841442 | -2.04 |
| 6842  | A2AQV2_MOUSE     | 1336667  | 2723333  | 0.000205 | 0.490820073 | -2.04 |
| 6376  | SYRM_MOUSE       | 815333.3 | 1660000  | 0.007303 | 0.491164659 | -2.04 |
| 6029  | RLA1_MOUSE       | 8650000  | 17700000 | 0.000839 | 0.488700565 | -2.05 |
| 5106  | E9PWY6_MOUSE     | 2176667  | 4470000  | 0.012126 | 0.486950037 | -2.05 |
| 1795  | GALE_MOUSE       | 6636667  | 13700000 | 0.007633 | 0.484428224 | -2.06 |
| 2476  | MYO1B_MOUSE      | 5290000  | 10893333 | 0.030274 | 0.485618115 | -2.06 |
| 2699  | PEPD_MOUSE       | 4160000  | 8580000  | 0.048476 | 0.484848485 | -2.06 |
| 5203  | A2BG76_MOUSE     | 1850000  | 3806667  | 0.003954 | 0.485989492 | -2.06 |
| 7465  | G3UZK1_MOUSE     | 2500000  | 5143333  | 0.006453 | 0.486066105 | -2.06 |
| 1709  | PCCB_MOUSE       | 5873333  | 12133333 | 0.011893 | 0.484065934 | -2.07 |
| 8313  | MSPD2_MOUSE      | 1896667  | 3916667  | 0.044804 | 0.484255319 | -2.07 |
| 1674  | NB5R1_MOUSE      | 18866667 | 39333333 | 0.001982 | 0.479661017 | -2.08 |
| 385   | CO5A1_MOUSE      | 37866667 | 79000000 | 0.000697 | 0.479324895 | -2.09 |
| 335   | NIBAN_MOUSE      | 36333333 | 75900000 | 0.008662 | 0.478700044 | -2.09 |
| 2133  | TGF11_MOUSE      | 9956667  | 20766667 | 0.027042 | 0.479454254 | -2.09 |
| 5999  | NDUA4_MOUSE      | 26500000 | 55433333 | 0.02359  | 0.478051714 | -2.09 |
| 5839  | RM37_MOUSE       | 3240000  | 6786667  | 0.001613 | 0.477406668 | -2.09 |
| 5814  | RIOK1_MOUSE      | 634000   | 1323333  | 0.026355 | 0.479093199 | -2.09 |
| 4045  | Q9CPX4_MOUSE     | 8500000  | 17966667 | 0.015943 | 0.47309833  | -2.11 |
| 3     | TBA1A_MOUSE      | 34600000 | 73866667 | 0.03566  | 0.468411552 | -2.13 |
| 5786  | RO60_MOUSE       | 2883333  | 6146667  | 0.049482 | 0.469088937 | -2.13 |
| 7165  | GL8D1_MOUSE      | 1723333  | 3663333  | 0.028502 | 0.470427662 | -2.13 |
| 12557 | H3BJV9_MOUSE     | 1510000  | 3213333  | 0.035541 | 0.469917012 | -2.13 |
| 168   | AL1L2_MOUSE      | 36400000 | 78100000 | 0.000362 | 0.466069142 | -2.15 |
| 3802  | COBA2_MOUSE      | 1536667  | 3306667  | 0.026278 | 0.464717742 | -2.15 |
| 5552  | Q80ZM5_MOUSE     | 1260000  | 2713333  | 0.023595 | 0.464373464 | -2.15 |
| 3328  | MARCS_MOUSE      | 1.04E+08 | 2.24E+08 | 0.005467 | 0.462891207 | -2.16 |
| 3993  | DIP2B_MOUSE      | 1103000  | 2400000  | 0.038835 | 0.459583333 | -2.18 |
| 6112  | Q8C4U8_MOUSE     | 965333.3 | 2100000  | 0.030352 | 0.45968254  | -2.18 |
| 3998  | F7DEU6_MOUSE     | 2013333  | 4433333  | 0.02297  | 0.454135338 | -2.2  |
| 1982  | STK26_MOUSE      | 2450000  | 5433333  | 0.016062 | 0.450920245 | -2.22 |
| 5480  | EMIL1_MOUSE      | 952666.7 | 2120000  | 0.010317 | 0.449371069 | -2.23 |
| 5898  | IMPCT_MOUSE      | 4883333  | 10950000 | 0.04177  | 0.445966514 | -2.24 |
| 1040  | PHLB2_MOUSE      | 12590000 | 28266667 | 0.032196 | 0.445400943 | -2.25 |
| 6484  | Q99L96_MOUSE     | 3050000  | 6990000  | 0.035494 | 0.436337625 | -2.29 |
| 6563  | ITPR1_MOUSE      | 520000   | 1193333  | 0.009491 | 0.43575419  | -2.29 |
| 1405  | GNS_MOUSE        | 25533333 | 58833333 | 0.003719 | 0.433994334 | -2.3  |
| 3632  | BCAT1_MOUSE      | 5500000  | 12700000 | 0.017716 | 0.433070866 | -2.31 |
| 1176  | P5CR1_MOUSE      | 17433333 | 40566667 | 0.043011 | 0.429745275 | -2.33 |
| 10099 | Q60709_MOUSE     | 313000   | 729000   | 0.0087   | 0.429355281 | -2.33 |
| 891   | ACOT2_MOUSE      | 12366667 | 28933333 | 0.002983 | 0.427419355 | -2.34 |
| 5967  | RECK_MOUSE       | 2566667  | 6013333  | 0.035161 | 0.426829268 | -2.34 |
| 8059  | FBX4_MOUSE       | 648000   | 1530000  | 0.013312 | 0.423529412 | -2.36 |
| 2590  | A0A1L1STC6_MOUSE | 1020667  | 2466667  | 0.022068 | 0.413783784 | -2.42 |
| 3436  | PPBT_MOUSE       | 2266667  | 5486667  | 0.006844 | 0.413122722 | -2.42 |
| 5470  | MK67I_MOUSE      | 4630000  | 11256667 | 0.021708 | 0.411311815 | -2.43 |
| 5312  | H7BX23_MOUSE     | 1423333  | 3476667  | 0.006616 | 0.409395973 | -2.44 |
| 8429  | PXDN_MOUSE       | 371000   | 905000   | 0.000111 | 0.409944751 | -2.44 |

|       |                  |          |          |          |             |       |
|-------|------------------|----------|----------|----------|-------------|-------|
| 3806  | A0A0G2JE03_MOUSE | 3103333  | 7596667  | 1.38E-05 | 0.408512505 | -2.45 |
| 5889  | TM87A_MOUSE      | 4500000  | 11070000 | 0.033526 | 0.406504065 | -2.46 |
| 4760  | SNX17_MOUSE      | 981666.7 | 2423333  | 0.001737 | 0.405089409 | -2.47 |
| 8677  | NTAN1_MOUSE      | 159000   | 392333.3 | 0.042111 | 0.40526763  | -2.47 |
| 7205  | Q3URQ4_MOUSE     | 440000   | 1097667  | 0.027773 | 0.400850288 | -2.49 |
| 1556  | ALAT2_MOUSE      | 5790000  | 14466667 | 0.032052 | 0.400230415 | -2.5  |
| 3122  | ELP2_MOUSE       | 2106667  | 5273333  | 0.0092   | 0.399494311 | -2.5  |
| 7301  | WDR75_MOUSE      | 1056000  | 2640000  | 0.033896 | 0.4         | -2.5  |
| 4397  | GMPR2_MOUSE      | 3346667  | 8446667  | 0.002021 | 0.396211523 | -2.52 |
| 4721  | DJC11_MOUSE      | 2963333  | 7473333  | 0.041579 | 0.396520963 | -2.52 |
| 6162  | D39U1_MOUSE      | 792333.3 | 2010000  | 0.040161 | 0.394195688 | -2.54 |
| 1762  | A0A0R4J2B2_MOUSE | 13166667 | 34166667 | 0.019317 | 0.385365854 | -2.59 |
| 5027  | TSP2_MOUSE       | 320333.3 | 835000   | 0.027352 | 0.383632735 | -2.61 |
| 1813  | KDEL1_MOUSE      | 5840000  | 15733333 | 0.04398  | 0.371186441 | -2.69 |
| 5467  | G3UW90_MOUSE     | 1395333  | 3786667  | 0.014953 | 0.368485915 | -2.71 |
| 1198  | GRB10_MOUSE      | 8766667  | 23833333 | 0.003383 | 0.367832168 | -2.72 |
| 4645  | XPO4_MOUSE       | 728000   | 1996667  | 0.034898 | 0.364607679 | -2.74 |
| 8492  | GP180_MOUSE      | 322000   | 888333.3 | 0.032744 | 0.362476548 | -2.76 |
| 1620  | SUCB2_MOUSE      | 8810000  | 24500000 | 0.006868 | 0.359591837 | -2.78 |
| 6970  | S2551_MOUSE      | 679000   | 1916667  | 0.024149 | 0.35426087  | -2.82 |
| 6035  | IRF3_MOUSE       | 1033333  | 2946667  | 0.000499 | 0.350678733 | -2.85 |
| 1466  |                  | 4296667  | 12300000 | 0.00691  | 0.349322493 | -2.86 |
| 1782  | MAP2_MOUSE       | 2783333  | 8040000  | 0.011845 | 0.346185738 | -2.89 |
| 5456  | A0A1Y7VNM7_MOUSE | 1669333  | 4823333  | 0.020366 | 0.34609537  | -2.89 |
| 256   | COBA1_MOUSE      | 25300000 | 75133333 | 0.009373 | 0.336734694 | -2.97 |
| 197   | COCA1_MOUSE      | 75266667 | 2.27E+08 | 0.003404 | 0.332058824 | -3.01 |
| 17    | CO1A2_MOUSE      | 76133333 | 2.32E+08 | 0.003491 | 0.328633094 | -3.04 |
| 5323  | PAOX_MOUSE       | 1270000  | 3886667  | 0.008852 | 0.326758148 | -3.06 |
| 2570  | A2AJQ0_MOUSE     | 1406667  | 4336667  | 5.05E-05 | 0.324365872 | -3.08 |
| 50    | CO1A1_MOUSE      | 1.29E+08 | 3.99E+08 | 0.00328  | 0.324040067 | -3.09 |
| 5767  | G3X920_MOUSE     | 807333.3 | 2496667  | 0.01723  | 0.323364486 | -3.09 |
| 10803 | NOL9_MOUSE       | 633333.3 | 1966667  | 0.000527 | 0.322033898 | -3.11 |
| 3100  | ITB5_MOUSE       | 3260000  | 10456667 | 0.015362 | 0.311762831 | -3.21 |
| 5182  | A0A0R4J1B9_MOUSE | 2306667  | 7616667  | 0.009676 | 0.302844639 | -3.3  |
| 10618 | I2BP1_MOUSE      | 206666.7 | 682666.7 | 0.020647 | 0.302734375 | -3.3  |
| 7801  | PLRKT_MOUSE      | 1170000  | 3873333  | 0.000115 | 0.302065404 | -3.31 |
| 2046  | COG2_MOUSE       | 2270000  | 7796667  | 0.041763 | 0.291150064 | -3.43 |
| 8428  | LTV1_MOUSE       | 1016333  | 3483333  | 0.002413 | 0.291770335 | -3.43 |
| 3829  | Q8VCG1_MOUSE     | 6696667  | 24533333 | 0.002632 | 0.272961957 | -3.66 |
| 1764  | CP51A_MOUSE      | 5476667  | 20500000 | 0.019921 | 0.267154472 | -3.74 |
| 7834  | VP37A_MOUSE      | 284666.7 | 1090333  | 0.018388 | 0.261082238 | -3.83 |
| 7358  | PWP2_MOUSE       | 252666.7 | 973666.7 | 0.026358 | 0.259500171 | -3.85 |
| 1882  | Q543V3_MOUSE     | 1566667  | 6166667  | 0.020058 | 0.254054054 | -3.94 |
| 1432  | ACADS_MOUSE      | 8276667  | 32900000 | 0.003014 | 0.251570415 | -3.98 |
| 8112  | EYA4_MOUSE       | 495000   | 1990000  | 0.024057 | 0.248743719 | -4.02 |
| 9137  | Q9DC42_MOUSE     | 1087667  | 4376667  | 0.021025 | 0.248514851 | -4.02 |
| 4535  | P3H2_MOUSE       | 1042000  | 4260000  | 0.02835  | 0.244600939 | -4.09 |
| 6425  | B1B1A8_MOUSE     | 571666.7 | 2350000  | 0.00536  | 0.243262411 | -4.11 |
| 7871  | ITGBL_MOUSE      | 281333.3 | 1210667  | 0.015156 | 0.232378855 | -4.3  |
| 43    | CO2A1_MOUSE      | 95033333 | 4.17E+08 | 0.037305 | 0.22808     | -4.38 |

|      |                  |          |          |          |             |        |
|------|------------------|----------|----------|----------|-------------|--------|
| 3200 | CTHR1_MOUSE      | 3126667  | 13933333 | 0.002274 | 0.224401914 | -4.46  |
| 3687 | SRGP2_MOUSE      | 584666.7 | 2670000  | 0.021396 | 0.21897628  | -4.57  |
| 7545 | E9Q7S4_MOUSE     | 1256667  | 5940000  | 0.000201 | 0.211560045 | -4.73  |
| 9841 | BCS1_MOUSE       | 231000   | 1124667  | 0.043312 | 0.205394191 | -4.87  |
| 6165 | POSTN_MOUSE      | 631333.3 | 3103333  | 0.004414 | 0.203437164 | -4.92  |
| 6416 | D3Z5M8_MOUSE     | 358333.3 | 1786667  | 0.046114 | 0.200559701 | -4.99  |
| 5579 | ADH7_MOUSE       | 599666.7 | 3033333  | 0.034012 | 0.197692308 | -5.06  |
| 6323 | Q91V35_MOUSE     | 525000   | 2683333  | 0.02876  | 0.195652174 | -5.11  |
| 3648 | MIME_MOUSE       | 1136667  | 5933333  | 0.004212 | 0.191573034 | -5.22  |
| 3749 | GSTA1_MOUSE      | 4960000  | 26200000 | 0.0386   | 0.189312977 | -5.28  |
| 1618 | G3X995_MOUSE     | 3466667  | 18300000 | 7.55E-06 | 0.189435337 | -5.28  |
| 7957 | LAT1_MOUSE       | 418000   | 2266667  | 0.003128 | 0.184411765 | -5.42  |
| 4049 | ITA2_MOUSE       | 556333.3 | 3150000  | 0.041182 | 0.176613757 | -5.66  |
| 7191 | RAD50_MOUSE      | 127333.3 | 840666.7 | 0.039041 | 0.15146709  | -6.6   |
| 5721 | KCC4_MOUSE       | 329666.7 | 2376667  | 0.049928 | 0.138709677 | -7.21  |
| 4861 | Q59IW9_MOUSE     | 450666.7 | 3590000  | 0.006639 | 0.12553389  | -7.97  |
| 9624 | A0A1L1STF4_MOUSE | 6066.667 | 403666.7 | 0.018453 | 0.015028902 | -66.54 |
