# Supplementary material for: TGFβ attenuates cartilage extracellular matrix degradation via enhancing FBXO6-mediated MMP14 ubiquitination
Source: PubMed Central journal article supplement (PMC7392491; doi:10.1136/annrheumdis-2019-216911), 2020-05-14
Supplement: annrheumdis-2019-216911supp007.pdf [file annrheumdis-2019-216911supp007.pdf]

| ID                                                                 | Gene Name                                                          |
|--------------------------------------------------------------------|--------------------------------------------------------------------|
| gene name                                                          |                                                                    |
| main functions                                                     |                                                                    |
| association with oc\ob\cartilage\disc(np<br>af ep notochord cells) |                                                                    |
| IPI00420067                                                        | ADAM metallopeptidase domain 15                                    |
| IPI00288894                                                        | ADAM metallopeptidase domain 17                                    |
| IPI00307592                                                        | ATP-binding cassette, sub-family A (ABC1), member 2                |
| IPI00291373                                                        | ATP-binding cassette, sub-family D (ALD), member 1                 |
| IPI00002372                                                        | ATP-binding cassette, sub-family D (ALD), member 3                 |
| IPI00784119                                                        | ATPase, H <sup>+</sup> transporting, lysosomal accessory protein 1 |
| IPI00021391                                                        | C-type lectin domain family 2, member B                            |
| IPI00788676                                                        | CD109 molecule                                                     |
| IPI00384548                                                        | CD63 molecule                                                      |
| IPI00736241                                                        | CUB domain containing protein 1                                    |
| IPI00844115                                                        | DnaJ (Hsp40) homolog, subfamily C, member 10                       |
| IPI00005683                                                        | ER degradation enhancer, mannosidase alpha-like 1                  |
| IPI00892978                                                        | ER degradation enhancer, mannosidase alpha-like 3                  |
| IPI00007940                                                        | ER lipid raft associated 1                                         |
| IPI00026942                                                        | ER lipid raft associated 2                                         |
| IPI00383663                                                        | ERGIC and golgi 3                                                  |
| IPI00872773                                                        | ER01-like ( <i>S. cerevisiae</i> )                                 |
| IPI00334818                                                        | FK506 binding protein 10, 65 kDa                                   |
| IPI00943593                                                        | Fraser syndrome 1                                                  |
| IPI00879033                                                        | G protein-coupled receptor 110                                     |
| IPI00445699                                                        | KDEL (Lys-Asp-Glu-Leu) containing 2                                |
| IPI00645487                                                        | KIAA0090                                                           |
| IPI00885086                                                        | KIAA0746 protein                                                   |
| IPI00456649                                                        | KIAA1161                                                           |
| IPI00008787                                                        | N-acetylglucosaminidase, alpha-                                    |
| IPI00940046                                                        | N-acylsphingosine amidohydrolase (acid ceramidase) 1               |
| IPI00005600                                                        | N-deacetylase/N-sulfotransferase (heparan glucosaminyl) 2          |
| IPI00019988                                                        | N-sulfoglucosamine sulfohydrolase                                  |
| IPI00794861                                                        | NEL-like 2 (chicken)                                               |

|                          |                                                                                    |
|--------------------------|------------------------------------------------------------------------------------|
| IPI00413732              | NODAL modulator 3; NODAL modulator 1; NODAL modulator 2                            |
| IPI00646796, IPI00005107 | Niemann-Pick disease, type C1                                                      |
| IPI00297492              | STT3, subunit of the oligosaccharyltransferase complex, homolog A                  |
| IPI00152377              | STT3, subunit of the oligosaccharyltransferase complex, homolog B                  |
| IPI00642739              | TIMP metalloproteinase inhibitor 1                                                 |
| IPI00294455              | UDP glycosyltransferase 8                                                          |
| IPI00031983              | UDP-GlcNAc:betaGal beta-1,3-N-acetylglucosaminyltransferase 3                      |
| IPI00026991              | UDP-N-acetyl-alpha-D-galactosamine:polypeptide N-acetylgalactosaminyltransferase 6 |
| IPI00002511              | activating transcription factor 6                                                  |
| IPI00374563              | agrin                                                                              |
| IPI00745872              | albumin                                                                            |
| IPI00296524              | arylsulfatase family, member K                                                     |
| IPI00021552              | beta-1,3-N-acetylgalactosaminyltransferase 1 (globoside blood group)               |
| IPI00744286              | beta-1,3-N-acetylgalactosaminyltransferase 2                                       |
| IPI00025073              | bone morphogenetic protein 3. . .                                                  |
| IPI00946206              | butyrylcholinesterase                                                              |
| IPI00658202              | cadherin 2, type 1, N-cadherin (neuronal)                                          |
| IPI00008403              | carbohydrate (N-acetylglucosamine 6-0) sulfotransferase 7                          |
| IPI00748502              | cartilage associated protein                                                       |
| IPI00640525              | cathepsin A                                                                        |
| IPI00022810              | cathepsin C                                                                        |
| IPI00011229              | cathepsin D                                                                        |
| IPI00642813              | cerebral endothelial cell adhesion molecule                                        |
| IPI00465319              | chondroitin polymerizing factor                                                    |
| IPI00945406              | chondroitin sulfate glucuronyltransferase                                          |
| IPI00432337              | chromosome 2 open reading frame 30                                                 |
| IPI00171385              | chromosome 3 open reading frame 39                                                 |
| IPI00400826              | clusterin                                                                          |
| IPI00291136              | collagen, type VI, alpha 1                                                         |
| IPI00001245              | contactin associated protein-like 3; contactin associated protein-like 3B          |
| IPI00794466              | crystallin, alpha B                                                                |
| IPI00386115              | cyclin M3                                                                          |
| IPI00218928              | desmocollin 3                                                                      |

|             |                                                                           |
|-------------|---------------------------------------------------------------------------|
| IPI00025753 | desmoglein 1                                                              |
| IPI00216370 | ectonucleoside triphosphate diphosphohydrolase 2                          |
| IPI00184311 | ectonucleotide pyrophosphatase/phosphodiesterase 1                        |
| IPI00165949 | endoplasmic reticulum aminopeptidase 1                                    |
| IPI00747807 | endoplasmic reticulum aminopeptidase 2                                    |
| IPI00216758 | endothelin converting enzyme 1                                            |
| IPI00657648 | ependymin related protein 1 (zebrafish)                                   |
| IPI00012440 | fucosidase, alpha-L- 2, plasma                                            |
| IPI00025869 | galactosidase, alpha                                                      |
| IPI00796919 | galactosidase, beta 1                                                     |
| IPI00012102 | glucosamine (N-acetyl)-6-sulfatase                                        |
| IPI00883772 | glucosidase, alpha; acid                                                  |
| IPI00383581 | glucosidase, alpha; neutral AB                                            |
| IPI00759616 | glucosidase, beta; acid (includes glucosylceramidase)                     |
| IPI00219516 | glucuronidase, beta                                                       |
| IPI00100656 | glycoprotein, synaptic 2                                                  |
| IPI00168262 | glycosyltransferase 25 domain containing 1                                |
| IPI00296713 | granulin                                                                  |
| IPI00027230 | heat shock protein 90kDa beta (Grp94), member 1                           |
| IPI00943326 | heparan sulfate proteoglycan 2                                            |
| IPI00607861 | hexose-6-phosphate dehydrogenase (glucose 1-dehydrogenase)                |
| IPI00023601 | hyaluronan and proteoglycan link protein 1                                |
| IPI00000877 | hypoxia up-regulated 1                                                    |
| IPI00902482 | iduronidase, alpha-L-                                                     |
| IPI00903213 | insulin-like growth factor 2 receptor                                     |
| IPI00006547 | integrin alpha FG-GAP repeat containing 1                                 |
| IPI00845516 | integrin alpha FG-GAP repeat containing 3                                 |
| IPI00290043 | integrin, alpha 3 (antigen CD49C, alpha 3 subunit of VLA-3 receptor)      |
| IPI00306604 | integrin, alpha 5 (fibronectin receptor, alpha polypeptide)               |
| IPI00216225 | integrin, alpha 6                                                         |
| IPI00555991 | integrin, alpha V (vitronectin receptor, alpha polypeptide, antigen CD51) |
| IPI00217563 | fibronectin receptor, beta polypeptide, antigen CD29 includes MDF2, MSK12 |
| IPI00029741 | integrin, beta 5                                                          |
| IPI00642425 | intercellular adhesion molecule 1                                         |
| IPI00554788 | keratin 18; keratin 18 pseudogene 26; keratin 18 pseudogene 19            |

|             |                                                                    |
|-------------|--------------------------------------------------------------------|
| IPI00554648 | keratin 8 pseudogene 9; similar to keratin 8; keratin 8            |
| IPI00743994 | laminin, alpha 3                                                   |
| IPI00783665 | laminin, alpha 5                                                   |
| IPI00853454 | laminin, beta 1                                                    |
| IPI00299404 | laminin, beta 3                                                    |
| IPI00298281 | laminin, gamma 1 (formerly LAMB2)                                  |
| IPI00023673 | lectin, galactoside-binding, soluble, 3 binding protein            |
| IPI00293303 | legumain                                                           |
| IPI00045839 | leucine proline-enriched proteoglycan (leprecan) 1                 |
| IPI00478892 | leucine-rich repeats and immunoglobulin-like domains 2             |
| IPI00221241 | leucyl/cystinyl aminopeptidase                                     |
| IPI00908663 | low density lipoprotein receptor                                   |
| IPI00414231 | low density lipoprotein receptor-related protein 10                |
| IPI00020557 | low density lipoprotein-related protein 1                          |
| IPI00908532 | lysosomal-associated membrane protein 1                            |
| IPI00216172 | lysosomal-associated membrane protein 2                            |
| IPI00294839 | lysyl oxidase-like 2                                               |
| IPI00219706 | macrophage stimulating 1 receptor (c-met-related tyrosine kinase)  |
| IPI00644131 | mannosidase, alpha, class 2B, member 1                             |
| IPI00298793 | mannosidase, beta A, lysosomal                                     |
| IPI00896498 | matrix metalloproteinase 14 (membrane-inserted)                    |
| IPI00294528 | met proto-oncogene (hepatocyte growth factor receptor)             |
| IPI00918002 | mucin 5B, oligomeric mucus/gel-forming                             |
| IPI00018311 | neuroplastin                                                       |
| IPI00470649 | nicalin homolog (zebrafish)                                        |
| IPI00375688 | nicastatin                                                         |
| IPI00291755 | nucleoporin 210kDa                                                 |
| IPI00737429 | odt, odd Oz/ten-m homolog 4 (Drosophila)                           |
| IPI00329760 | osteosarcoma amplified 9, endoplasmic reticulum associated protein |
| IPI00290945 | paraoxonase 2                                                      |
| IPI00016112 | peroxidasin homolog (Drosophila)                                   |
| IPI00465308 | phosphatidylinositol glycan anchor biosynthesis, class S           |
| IPI00401043 | phosphatidylinositol glycan anchor biosynthesis, class T           |
| IPI00301459 | phospholipase A2, group XV                                         |
| IPI00328243 | phospholipase D family, member 3                                   |

|              |             |                                                                    |
|--------------|-------------|--------------------------------------------------------------------|
| IPI00479511  |             | plasminogen activator, tissue                                      |
| IPI00219426  |             | poliovirus receptor                                                |
| IPI00384280  |             | prenylcysteine oxidase 1                                           |
| IPI00184180  |             | prenylcysteine oxidase 1 like                                      |
| IPI00943008  |             | procollagen-lysine 1, 2-oxoglutarate 5-dioxygenase 1               |
| IPI00472165  |             | procollagen-lysine, 2-oxoglutarate 5-dioxygenase 2                 |
| IPI00030255  |             | procollagen-lysine, 2-oxoglutarate 5-dioxygenase 3                 |
| IPI00009923  |             | prolyl 4-hydroxylase, alpha polypeptide I                          |
| IPI00399307  |             | prolylcarboxypeptidase (angiotensinase C)                          |
| IPI00012503  |             | prosaposin                                                         |
| IPI00218176  |             | protein O-fucosyltransferase 1                                     |
| IPI00329648  |             | protein-O-mannosyltransferase 2                                    |
| IPI00465016  |             | quiescin Q6 sulfhydryl oxidase 1                                   |
| IPI00793589, | IPI00025874 | ribophorin I                                                       |
| IPI00383680  |             | ribophorin II                                                      |
| IPI00395914  |             | scavenger receptor class A, member 5 (putative)                    |
| IPI00291007  |             | scavenger receptor class B, member 1                               |
| IPI00002790  |             | sel-1 suppressor of lin-12-like (C. elegans)                       |
| IPI00644196  |             | serpin peptidase inhibitor, clade B (ovalbumin), member 5          |
| IPI00914848  |             | serpin peptidase inhibitor, clade E , member 2                     |
| IPI00759728  |             | sialic acid acetyltransferase                                      |
| IPI00019472  |             | solute carrier family 1 (neutral amino acid transporter), member 5 |
| IPI00554481  |             | solute carrier family 3, member 2                                  |
| IPI00022608  |             | soritin-related receptor, L(DLR class) A repeats-containing        |
| IPI00005614, | IPI00328230 | spectrin, beta, non-erythrocytic 1                                 |
| IPI00297252  |             | sulfatase 2                                                        |
| IPI00739876  |             | tectonic family member 3                                           |
| IPI00220213  |             | tenascin C                                                         |
| IPI00064193  |             | thioredoxin-related transmembrane protein 3                        |
| IPI00007798  |             | thyrotropin-releasing hormone degrading enzyme                     |
| IPI00168878  |             | torsin A interacting protein 2                                     |
| IPI00941838  |             | torsin family 1, member B (torsin B)                               |

|                          |                                                         |
|--------------------------|---------------------------------------------------------|
| IPI00022462, IPI00924935 | transferrin receptor (p90, CD71)                        |
| IPI00000075              | transforming growth factor, beta 1                      |
| IPI00220156              | transforming growth factor, beta 2                      |
| IPI00470924              | transmembrane and tetratricopeptide repeat containing 3 |
| IPI00028055              | transmembrane emp24-like trafficking protein 10 (yeast) |
| IPI00031064              | transmembrane protein 126A                              |
| IPI00916157              | transmembrane protein 131                               |
| IPI00013683              | tubulin, beta 3; melanocortin 1 receptor                |
