# Supplementary material for: TGFβ attenuates cartilage extracellular matrix degradation via enhancing FBXO6-mediated MMP14 ubiquitination
Source: PubMed Central journal article supplement (PMC7392491; doi:10.1136/annrheumdis-2019-216911), 2020-05-14

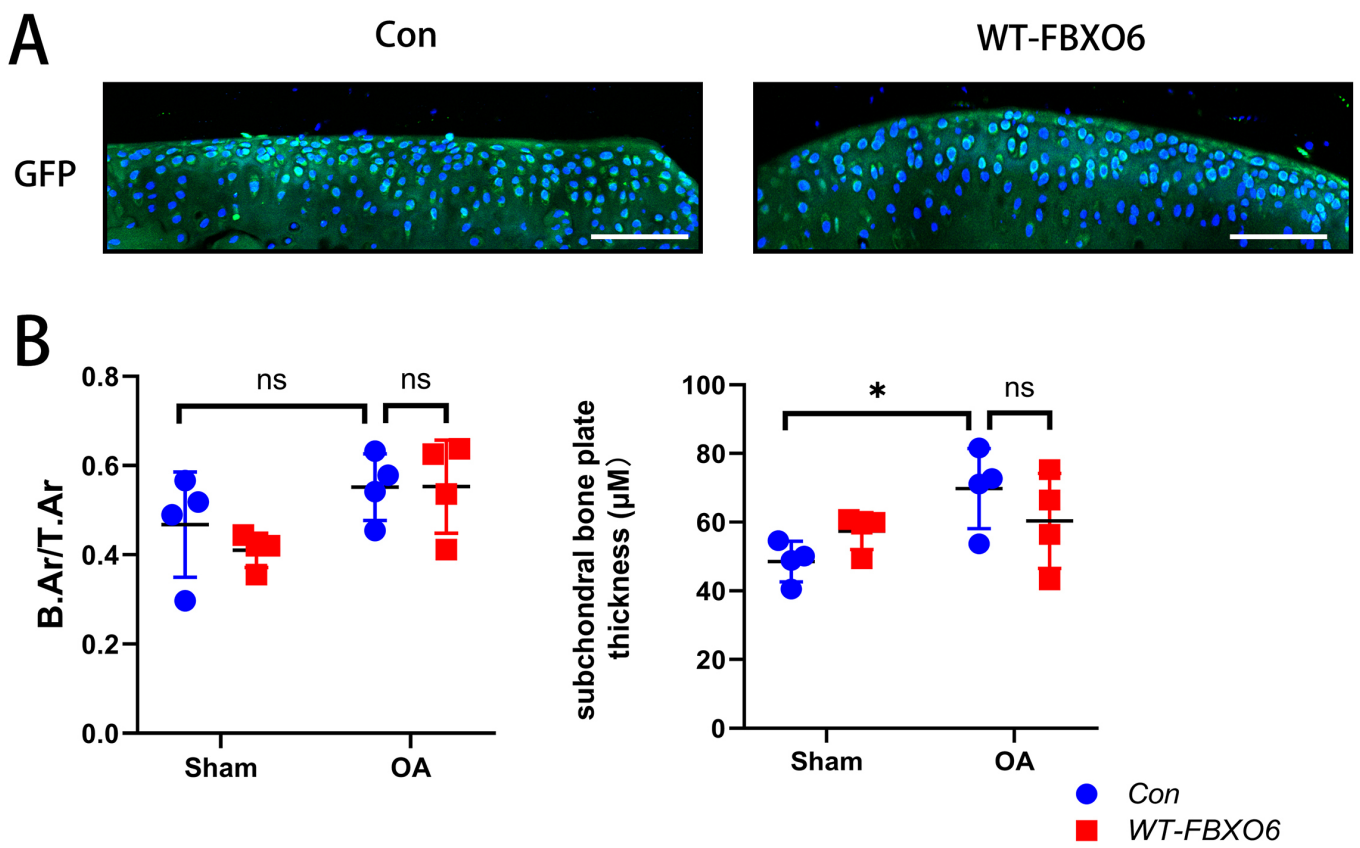

Supplement: annrheumdis-2019-216911supp012.pdf [file annrheumdis-2019-216911supp012.pdf]
