# Supplementary material for: TGFβ attenuates cartilage extracellular matrix degradation via enhancing FBXO6-mediated MMP14 ubiquitination
Source: PubMed Central journal article supplement (PMC7392491; doi:10.1136/annrheumdis-2019-216911), 2020-05-14
Supplement: annrheumdis-2019-216911supp013.pdf [file annrheumdis-2019-216911supp013.pdf]

| Origin | Gene     | Strand                         | Primer Sequences              |
|--------|----------|--------------------------------|-------------------------------|
| Mouse  | ADAMTS4  | forward                        | 5'-CAGTCACCTCTAAGCCAAAGAAA-3' |
|        |          | reverse                        | 5'-CTTCCGGCGTAGGATGTGAG-3'    |
|        | ADAMTS5  | forward                        | 5'-CCTTTGCTTGCTTTCCTTTCC-3'   |
|        |          | reverse                        | 5'-CTCCGACCCACTTCCTTTCT-3'    |
|        | MMP3     | forward                        | 5'-TTAAAGACAGGCACTTTTGGCG-3'  |
|        |          | reverse                        | 5'-CCCTCGTATAGCCCAGAACT-3'    |
|        | MMP13    | forward                        | 5'-TGTTTGCAGAGCACTACTTGAA-3'  |
|        |          | reverse                        | 5'-CAGTCACCTCTAAGCCAAAGAAA-3' |
|        | Col2A1   | forward                        | 5'-GAGCAGCAAGAGCAAGGAAA-3'    |
|        |          | reverse                        | 5'-CGGAGGAAAGTCATCTGGAC-3'    |
|        | Aggrecan | forward                        | 5'-GGGACAGGGTGAGAAGTAAGG-3'   |
|        |          | reverse                        | 5'-CTGGAGGCGAAGTAACCAAC-3'    |
|        | Sox9     | forward                        | 5'-GAGGAAGTCGGTGAAGAACG-3'    |
|        |          | reverse                        | 5'-GAGGAGGAATGTGGGGAGT-3'     |
| 18S    | forward  | 5'-AGGGGAGAGCGGGTAAGAGA-3'     |                               |
|        | reverse  | 5'-GGACAGGACTAGGCGGAACA-3'     |                               |
|        | reverse  | 5'-AGAGCTCCGAGCTCACCATC-3'     |                               |
| FBXO6  | forward  | 5'-TTGTCACCTCTTTTGGAGATGTGC-3' |                               |
|        | reverse  | 5'-CCAGTCCTTAACCACAATGTGAG-3'  |                               |
| Human  | 18S      | forward                        | 5'-CCTGCGGCTTAATTTGACTC-3'    |
|        |          | reverse                        | 5'-AACTAAGAACGGCCATGCAC-3'    |
|        | FBXO2    | forward                        | 5'-GTAACCCGTGTGGGGAAGAG-3'    |
|        |          | reverse                        | 5'-TCTTGACGCTCTCATCGTGG-3'    |
|        | FBXO17   | forward                        | 5'-ATCTGTGTGGCTGACTGGTG-3'    |
|        |          | reverse                        | 5'-ATACGTAGCGGATGCCCTTG-3'    |
|        | FBXO27   | forward                        | 5'-CGTCCAACCTTCTAGACGCCA-3'   |
|        |          | reverse                        | 5'-TTGGAGAACACGTGGGTGAC-3'    |
|        | FBXO44   | forward                        | 5'-TGAATGGAGGCGATGAGTGG-3'    |
|        |          | reverse                        | 5'-GAGGCAGGTGCTGGTCATTG-3'    |
|        | FBXO6    | forward                        | 5'-GAGACAGCTTCAGGACACGCA-3'   |
|        |          | reverse                        | 5'-CGGGCAGCTCGTTAATGCTG-3'    |
